# Supplementary material for: Cryptic chlorination by a non-haem iron enzyme during cyclopropyl amino acid biosynthesis
Source: Springer Nature journal article supplement (doi:10.1038/nature03797), 2005-08-01
Supplement: nature03797-s3.pdf [file nature03797-s3.pdf]

**Table S2. Kinetic parameters obtained using the ATP- $^{32}\text{P}$ PP<sub>i</sub> exchange assay with CmaA**

| Substrate           | $K_m$ (mM)  | $k_{\text{cat}}$ (min <sup>-1</sup> ) | $k_{\text{cat}}/K_m$ (mM <sup>-1</sup> ·min <sup>-1</sup> ) |
|---------------------|-------------|---------------------------------------|-------------------------------------------------------------|
| L- <i>allo</i> -Ile | 0.26 (0.07) | 398 (27)                              | 1,550 (360)                                                 |
| L-Ile               | 0.25 (0.06) | 31.3 (1.4)                            | 124 (28)                                                    |
| L-Val               | 1.2 (0.2)   | 130 (6)                               | 106 (15)                                                    |

Values in parenthesis represent standard errors. Rates of 2.13 min<sup>-1</sup> and 0.4 min<sup>-1</sup> were obtained with 5 mM  $\gamma$ -Cl-L-*allo*-Ile and  $\gamma$ -Cl-L-Val, respectively.
